# Supplementary material for: End-to-end lung cancer screening with three-dimensional deep learning on low-dose chest computed tomography
Source: Springer Nature journal article supplement (doi:10.1038/s41591-019-0447-x), 2019-05-20
Supplement: 41591_2019_447_MOESM1_ESM.pdf [file 41591_2019_447_MOESM1_ESM.pdf]

In the format provided by the authors and unedited.

# End-to-end lung cancer screening with three-dimensional deep learning on low-dose chest computed tomography

Diego Ardila <sup>1,5</sup>, Atilla P. Kiraly<sup>1,5</sup>, Sujeeth Bharadwaj<sup>1,5</sup>, Bokyung Choi<sup>1,5</sup>, Joshua J. Reicher<sup>2</sup>, Lily Peng<sup>1</sup>, Daniel Tse <sup>1\*</sup>, Mozziyar Etemadi <sup>3</sup>, Wenxing Ye<sup>1</sup>, Greg Corrado<sup>1</sup>, David P. Naidich<sup>4</sup> and Shravya Shetty<sup>1</sup>

---

<sup>1</sup>Google AI, Mountain View, CA, USA. <sup>2</sup>Stanford Health Care and Palo Alto Veterans Affairs, Palo Alto, CA, USA. <sup>3</sup>Northwestern Medicine, Chicago, IL, USA. <sup>4</sup>New York University-Langone Medical Center, Center for Biological Imaging, New York City, NY, USA. <sup>5</sup>These authors contributed equally: Diego Ardila, Atilla P. Kiraly, Sujeeth Bharadwaj, Bokyung Choi. \*e-mail: [tsed@google.com](mailto:tsed@google.com)

## SUPPLEMENTARY INFORMATION

|                                                       | Train Set | Tune Set | Full Test Set | Non priors reader study | Priors reader study |
|-------------------------------------------------------|-----------|----------|---------------|-------------------------|---------------------|
| <b>Age Bucket: # Patients With Available Data</b>     | 10306     | 2198     | 2347          | 507                     | 308                 |
| <b>Age Bucket: 55-60</b>                              | 4217      | 876      | 994           | 208                     | 133                 |
| <b>Age Bucket: 60-65</b>                              | 3201      | 691      | 678           | 143                     | 88                  |
| <b>Age Bucket: 65-70</b>                              | 1964      | 406      | 446           | 104                     | 64                  |
| <b>Age Bucket: 70-75</b>                              | 924       | 225      | 229           | 52                      | 23                  |
| <b>Cancer Stage *: # Patients With Available Data</b> | 398       | 94       | 86            | 83                      | 40                  |
| <b>Cancer Stage *: Cannot be assessed</b>             | 50        | 8        | 10            | 10                      | 3                   |
| <b>Cancer Stage *: Carcinoid, cannot be assessed</b>  | 3         | 0        | 0             | 0                       | 0                   |
| <b>Cancer Stage *: Missing TNM</b>                    | 7         | 5        | 3             | 3                       | 1                   |
| <b>Cancer Stage *: Occult Carcinoma</b>               | 5         | 1        | 0             | 0                       | 0                   |
| <b>Cancer Stage *: Stage IA</b>                       | 189       | 50       | 43            | 41                      | 19                  |
| <b>Cancer Stage *: Stage IB</b>                       | 29        | 5        | 4             | 4                       | 1                   |
| <b>Cancer Stage *: Stage IIA</b>                      | 4         | 3        | 3             | 3                       | 2                   |
| <b>Cancer Stage *: Stage IIB</b>                      | 2         | 1        | 0             | 0                       | 0                   |
| <b>Cancer Stage *: Stage IIIA</b>                     | 34        | 5        | 6             | 6                       | 3                   |
| <b>Cancer Stage *: Stage IIIB</b>                     | 24        | 6        | 6             | 6                       | 4                   |
| <b>Cancer Stage *: Stage IV</b>                       | 50        | 10       | 11            | 10                      | 7                   |
| <b>Cancer Stage *: TNM Not available</b>              | 1         | 0        | 0             | 0                       | 0                   |
| <b>Gender: # Patients With Available Data</b>         | 10306     | 2198     | 2347          | 507                     | 308                 |
| <b>Gender: Female</b>                                 | 4242      | 876      | 926           | 205                     | 119                 |
| <b>Gender: Male</b>                                   | 6064      | 1322     | 1421          | 302                     | 189                 |
| <b>Has nodule: # Patients With Available Data</b>     | 10306     | 2198     | 2347          | 507                     | 308                 |
| <b>Has nodule: False</b>                              | 4301      | 874      | 943           | 165                     | 109                 |
| <b>Has nodule: True</b>                               | 6005      | 1324     | 1404          | 342                     | 199                 |

**Supplementary Table [1]: Demographics and cancer staging breakdown of patients in NLST subsets used.** The total number of patients with cancer staging information (affected rows indicated by an asterisk \*) is greater than the number of cancer patients reported in this table because some patients received a cancer diagnosis after the initial 3 years of screening, and were therefore considered cancer negative patients in our main analysis. In this table we only show patients that were considered cancer positive in our main analysis.

|                                             | Train Set | Tune Set | Full Test Set | Non priors reader study | Priors reader study |
|---------------------------------------------|-----------|----------|---------------|-------------------------|---------------------|
| # Volumes with Manufacturer/Model Name Data | 47974     | 6034     | 6716          | 507                     | 308                 |
| GE MEDICAL SYSTEMS: CT scan                 | 34        | 5        | 2             | 0                       | 0                   |
| GE MEDICAL SYSTEMS: Discovery LS            | 136       | 38       | 34            | 3                       | 2                   |
| GE MEDICAL SYSTEMS: Discovery QX/i          | 76        | 17       | 17            | 0                       | 0                   |
| GE MEDICAL SYSTEMS: HiSpeed QX/i            | 2476      | 340      | 380           | 28                      | 15                  |
| GE MEDICAL SYSTEMS: LightSpeed Plus         | 3541      | 557      | 451           | 42                      | 25                  |
| GE MEDICAL SYSTEMS: LightSpeed Power        | 17        | 5        | 3             | 0                       | 0                   |
| GE MEDICAL SYSTEMS: LightSpeed Pro 16       | 2562      | 236      | 263           | 16                      | 14                  |
| GE MEDICAL SYSTEMS: LightSpeed QX/i         | 7180      | 983      | 1107          | 92                      | 50                  |
| GE MEDICAL SYSTEMS: LightSpeed Ultra        | 2724      | 314      | 399           | 22                      | 10                  |
| GE MEDICAL SYSTEMS: LightSpeed VCT          | 10        | 3        | 5             | 0                       | 0                   |
| GE MEDICAL SYSTEMS: LightSpeed16            | 5391      | 644      | 771           | 57                      | 43                  |
| GE MEDICAL SYSTEMS: QX/i                    | 11        | 0        | 4             | 2                       | 2                   |
| Philips: Mx8000                             | 3198      | 407      | 433           | 36                      | 20                  |
| Philips: Mx8000 IDT                         | 97        | 24       | 38            | 3                       | 0                   |
| Philips: Mx8000 IDT 16                      | 107       | 20       | 37            | 6                       | 6                   |
| SIEMENS: Emotion 16                         | 16        | 1        | 1             | 0                       | 0                   |
| SIEMENS: Emotion 6                          | 8         | 1        | 0             | 0                       | 0                   |
| SIEMENS: Sensation 10                       | 2         | 0        | 0             | 0                       | 0                   |
| SIEMENS: Sensation 16                       | 5811      | 691      | 765           | 51                      | 35                  |
| SIEMENS: Sensation 4                        | 1026      | 107      | 103           | 9                       | 4                   |
| SIEMENS: Sensation 64                       | 516       | 107      | 129           | 9                       | 9                   |
| SIEMENS: Volume Zoom                        | 10241     | 1146     | 1256          | 89                      | 50                  |
| TOSHIBA: Aquilion                           | 2793      | 388      | 518           | 42                      | 23                  |
| TOSHIBA: Mx8000                             | 1         | 0        | 0             | 0                       | 0                   |

**Supplementary Table [2]: Manufacturer and model distributions for cases in the NLST subsets used.** The number of volumes per manufacturer CT scanner model is shown for each column.

|                                                           | Train Set | Tune Set | Full Test Set | Non priors reader study | Priors reader study |
|-----------------------------------------------------------|-----------|----------|---------------|-------------------------|---------------------|
| Attenuation: Has a non solid nodule?: False               | 27271     | 5569     | 6219          | 453                     | 280                 |
| Attenuation: Has a non solid nodule?: True                | 2270      | 465      | 497           | 54                      | 28                  |
| Attenuation: Has a part solid nodule?: False              | 28814     | 5860     | 6567          | 485                     | 297                 |
| Attenuation: Has a part solid nodule?: True               | 727       | 174      | 149           | 22                      | 11                  |
| Attenuation: Has a solid nodule?: False                   | 19301     | 3900     | 4278          | 262                     | 159                 |
| Attenuation: Has a solid nodule?: True                    | 10240     | 2134     | 2438          | 245                     | 149                 |
| Margins: Has a nodule with poorly defined margins?: False | 26437     | 5356     | 6035          | 432                     | 270                 |
| Margins: Has a nodule with poorly defined margins?: True  | 3104      | 678      | 681           | 75                      | 38                  |
| Margins: Has a nodule with smooth margins?: False         | 20163     | 4130     | 4494          | 312                     | 180                 |
| Margins: Has a nodule with smooth margins?: True          | 9378      | 1904     | 2222          | 195                     | 128                 |
| Margins: Has a nodule with spiculated margins?: False     | 28211     | 5724     | 6387          | 435                     | 275                 |
| Margins: Has a nodule with spiculated margins?: True      | 1330      | 310      | 329           | 72                      | 33                  |
| Max Nodule Diameter Bucket: 0 mm < diameter <= 6 mm       | 8104      | 1643     | 1923          | 136                     | 90                  |
| Max Nodule Diameter Bucket: 15 mm < diameter <= 25 mm     | 426       | 89       | 99            | 30                      | 17                  |
| Max Nodule Diameter Bucket: 25 mm < diameter <= 250 mm    | 157       | 31       | 31            | 15                      | 5                   |
| Max Nodule Diameter Bucket: 6 mm < diameter <= 8 mm       | 2112      | 434      | 479           | 49                      | 28                  |
| Max Nodule Diameter Bucket: 8 mm < diameter <= 15 mm      | 1834      | 421      | 431           | 69                      | 32                  |
| Max Nodule Diameter Bucket: No nodule                     | 16908     | 3416     | 3753          | 208                     | 136                 |

**Supplementary Table [3]: Attenuation, margin, and diameter volume counts of relevant subsets of data.** These were generated using the nodule annotations in NLST, which happen once per patient year. The NLST data did not provide a reliable way of linking these back to a specific volume, but for all sets besides the training sets we used heuristics to select a single stack per screening year which was most likely to have been the stack that was used to generate the nodule annotations. However, this means that the volume counts are likely to be less accurate for the training set, where we did not apply heuristics to select a single stack per screening year.

**a) Sensitivity @ Average Reader Specificity  
Comparison: Without Priors**

| Risk Buckets      |                | Delta                |                                   |
|-------------------|----------------|----------------------|-----------------------------------|
| 1,2 vs. 3+        | Average Reader | 90.0<br>[86.0, 93.4] | +6.4*<br>[1.7, 10.9]<br>p=0.0093  |
|                   | Model          | 96.3<br>[92.0, 99.9] |                                   |
| 1,2,3 vs. 4A+     | Average Reader | 82.9<br>[76.6, 89.0] | +11.1*<br>[5.1, 16.9]<br>p=0.005  |
|                   | Model          | 94.0<br>[88.0, 98.7] |                                   |
| 1,2,3,4A vs. 4B/X | Average Reader | 62.5<br>[54.4, 70.7] | +20.7*<br>[12.5, 28.9]<br>p=.0001 |
|                   | Model          | 83.1<br>[74.7, 90.9] |                                   |

**b) Specificity @ Average Reader Sensitivity  
Comparison: Without Priors**

| Risk Buckets      |                | Delta                |                                   |
|-------------------|----------------|----------------------|-----------------------------------|
| 1,2 vs. 3+        | Average Reader | 69.7<br>[66.6, 72.8] | +21.3*<br>[17.9, 24.8]<br>p<10e-4 |
|                   | Model          | 91.0<br>[88.1, 93.9] |                                   |
| 1,2,3 vs. 4A+     | Average Reader | 86.0<br>[85.4, 89.8] | +9.4*<br>[7.0, 11.7]<br>p<10e-4   |
|                   | Model          | 95.4<br>[93.1, 97.3] |                                   |
| 1,2,3,4A vs. 4B/X | Average Reader | 95.3<br>[94.0, 96.6] | +3.7*<br>[2.7, 4.8]<br>p=0.0017   |
|                   | Model          | 99.0<br>[97.3, 98.8] |                                   |

**c) Sensitivity @ Average Reader Specificity  
Comparison: With Priors**

| Risk Buckets      |                | Delta                |                                 |
|-------------------|----------------|----------------------|---------------------------------|
| 1,2 vs. 3+        | Average Reader | 86.7<br>[79.7, 92.9] | +.8<br>[-9.8, 11.8]<br>p=.9007  |
|                   | Model          | 87.5<br>[76.5, 97.2] |                                 |
| 1,2,3 vs. 4A+     | Average Reader | 82.1<br>[74.1, 89.4] | +.4<br>[-10.3, 10.3]<br>p=.975  |
|                   | Model          | 82.5<br>[69.0, 93.9] |                                 |
| 1,2,3,4A vs. 4B/X | Average Reader | 70.0<br>[59.4, 80.3] | +10.0*<br>[4, 20.7]<br>p=0.0645 |
|                   | Model          | 80<br>[67.4, 91.9]   |                                 |

**d) Specificity @ Average Reader Sensitivity  
Comparison: With Priors**

| Risk Buckets      |                | Delta                |                                 |
|-------------------|----------------|----------------------|---------------------------------|
| 1,2 vs. 3+        | Average Reader | 83.7<br>[80.7, 86.7] | +.5<br>[-3.7, 4.6]<br>p=.8198   |
|                   | Model          | 84.2<br>[79.6, 88.6] |                                 |
| 1,2,3 vs. 4A+     | Average Reader | 89.1<br>[86.6, 91.6] | +3.7*<br>[0.8, 6.7]<br>p=.0139  |
|                   | Model          | 92.8<br>[89.7, 95.9] |                                 |
| 1,2,3,4A vs. 4B/X | Average Reader | 94.4<br>[92.6, 96.1] | +2.1*<br>[0.04, 4.2]<br>p=.0086 |
|                   | Model          | 96.5<br>[94.3, 98.6] |                                 |

**e) Sensitivity @ Retrospective Lung-RADS Specificity**

|                         |                      | Delta                           |  |
|-------------------------|----------------------|---------------------------------|--|
| Retrospective Lung-RADS | 77.9<br>[67.9, 86.2] | +11.6*<br>[3.9, 19.6]<br>p=.015 |  |
| Model                   | 89.5<br>[83.1, 95.5] |                                 |  |

**f) Specificity @ Retrospective Lung-RADS Sensitivity**

|                         |                      | Delta                         |  |
|-------------------------|----------------------|-------------------------------|--|
| Retrospective Lung-RADS | 90.1<br>[89.3, 90.7] | +5.8*<br>[5.1, 6.6]<br>p<1e-4 |  |
| Model                   | 95.8<br>[95.4, 96.3] |                               |  |

**Supplementary Table [4]: Results with matched specificity and sensitivity.** For the reader study without priors as an alternative to LUMAS, we (a) set the model's specificity to match the average reader specificity and then compared sensitivity and matched sensitivity and then (b) matched the average reader sensitivity and compared specificity. In both cases analysis was conducted with n=507 volumes from 507 patients. The same was done for the prior reader study in (c) and (d) with n=308 volumes from 308 patients. In the entire NLST test set, the matched specificity and sensitivity to NLST readers are shown for matched specificity (e) and matched sensitivity (f), comparing on n=6,716 cases. Note that these comparisons are more favorable to the model because they are based on operating points that maximize the delta. All comparisons in this table were made using a two-sided permutation test using 10,000 random resamplings of the data.

|                                    | Average Reader Lung-RADS 3+ | LUMAS 3+                   | Average Reader Lung-RADS 4A+ | LUMAS 4A+                  | Average Reader Lung-RADS 4B/X | LUMAS 4B/X                 | LUMAS 3+ - Average Reader Lung-RADS 3+ | LUMAS 4A+ - Average Reader Lung-RADS 4A+ | LUMAS 4B/X - Average Reader Lung-RADS 4B/X |
|------------------------------------|-----------------------------|----------------------------|------------------------------|----------------------------|-------------------------------|----------------------------|----------------------------------------|------------------------------------------|--------------------------------------------|
| Sensitivity                        | 89.960 [86.070, 93.373]     | 95.191 [89.888, 98.889]    | 82.932 [76.587, 88.951]      | 90.361 [83.333, 96.296]    | 62.450 [54.444, 70.667]       | 79.518 [70.787, 88.158]    | 5.221 [0.383, 9.848] *                 | 7.430 [1.667, 12.897] *                  | 17.068 [9.004, 24.542] *                   |
| Specificity                        | 69.712 [66.577, 72.804]     | 81.275 [77.331, 84.937]    | 85.989 [83.356, 88.391]      | 90.972 [88.108, 93.935]    | 95.320 [94.054, 96.580]       | 96.471 [94.580, 98.150]    | 11.564 [7.761, 15.114] *               | 4.983 [2.147, 7.987] *                   | 1.151 [-0.405, 2.605]                      |
| PPV                                | 0.396 [0.334, 0.458]        | 0.529 [0.449, 0.608]       | 0.567 [0.483, 0.640]         | 0.688 [0.606, 0.776]       | 0.747 [0.668, 0.814]          | 0.833 [0.750, 0.908]       | 0.133 [0.085, 0.180] *                 | 0.122 [0.060, 0.193] *                   | 0.086 [0.023, 0.153] *                     |
| NPV                                | 0.969 [0.955, 0.981]        | 0.987 [0.973, 0.997]       | 0.958 [0.941, 0.974]         | 0.977 [0.960, 0.991]       | 0.920 [0.897, 0.943]          | 0.955 [0.935, 0.976]       | 0.018 [0.005, 0.032] *                 | 0.019 [0.005, 0.033] *                   | 0.035 [0.018, 0.053] *                     |
| Sensitivity for Stage IA cancers   | 91.057 [85.294, 95.946]     | 95.122 [88.095, 100.000]   | 83.333 [74.286, 91.204]      | 95.122 [88.095, 100.000]   | 56.098 [44.086, 68.229]       | 80.488 [68.293, 91.304]    | 4.065 [-1.786, 10.648]                 | 11.789 [3.947, 20.325] *                 | 24.390 [10.417, 37.153] *                  |
| Sensitivity for Stage IB cancers   | 100.000 [100.000, 100.000]  | 100.000 [100.000, 100.000] | 100.000 [100.000, 100.000]   | 100.000 [100.000, 100.000] | 87.500 [50.000, 100.000]      | 100.000 [100.000, 100.000] | 0.000 [0.000, 0.000] *                 | 0.000 [0.000, 0.000] *                   | 12.500 [0.000, 50.000] *                   |
| Sensitivity for Stage IIA cancers  | 83.333 [0.000, 100.000]     | 100.000 [0.000, 100.000]   | 83.333 [0.000, 100.000]      | 100.000 [0.000, 100.000]   | 61.111 [0.000, 83.333]        | 100.000 [0.000, 100.000]   | 16.667 [0.000, 33.333] *               | 16.667 [0.000, 33.333] *                 | 38.889 [0.000, 50.000] *                   |
| Sensitivity for Stage IIB cancers  | 0.000 [0.000, 0.000]        | 0.000 [0.000, 0.000]       | 0.000 [0.000, 0.000]         | 0.000 [0.000, 0.000]       | 0.000 [0.000, 0.000]          | 0.000 [0.000, 0.000]       | 0.000 [0.000, 0.000] *                 | 0.000 [0.000, 0.000] *                   | 0.000 [0.000, 0.000] *                     |
| Sensitivity for Stage IIIA cancers | 94.444 [86.667, 100.000]    | 100.000 [100.000, 100.000] | 91.667 [77.778, 100.000]     | 66.667 [20.000, 100.000]   | 72.222 [26.667, 100.000]      | 50.000 [0.000, 100.000]    | 5.556 [0.000, 13.333] *                | -25.000 [-60.000, 0.000]                 | -22.222 [-66.667, 0.000]                   |
| Sensitivity for Stage IIIB cancers | 86.111 [58.333, 100.000]    | 83.333 [42.857, 100.000]   | 86.111 [58.333, 100.000]     | 83.333 [42.857, 100.000]   | 75.000 [33.333, 100.000]      | 83.333 [42.857, 100.000]   | -2.778 [-16.667, 8.333]                | -2.778 [-16.667, 8.333]                  | 8.333 [-16.667, 41.667]                    |
| Sensitivity for Stage IV cancers   | 90.000 [77.778, 98.485]     | 90.000 [66.667, 100.000]   | 78.333 [52.778, 98.333]      | 90.000 [66.667, 100.000]   | 65.000 [38.889, 87.879]       | 80.000 [50.000, 100.000]   | 0.000 [-22.917, 18.750]                | 11.667 [0.000, 31.667] *                 | 15.000 [3.704, 27.778] *                   |
| Sensitivity For 0 to 6 mm          | 66.667 [0.000, 66.667]      | 50.000 [0.000, 100.000]    | 25.000 [0.000, 50.000]       | 50.000 [0.000, 100.000]    | 0.000 [0.000, 0.000]          | 50.000 [0.000, 100.000]    | -16.667 [-66.667, 33.333]              | 25.000 [0.000, 50.000] *                 | 50.000 [0.000, 100.000] *                  |
| Sensitivity For 6 to 8 mm          | 75.000 [61.111, 86.667]     | 75.000 [33.333, 100.000]   | 37.500 [16.667, 58.333]      | 50.000 [14.286, 100.000]   | 6.250 [0.000, 15.385]         | 12.500 [0.000, 40.000]     | 0.000 [-36.111, 29.167]                | 12.500 [-30.556, 54.762]                 | 6.250 [-6.250, 25.000]                     |
| Sensitivity For 8 to 15 mm         | 87.500 [78.495, 95.238]     | 95.833 [85.714, 100.000]   | 79.861 [68.116, 90.278]      | 91.667 [78.261, 100.000]   | 36.806 [26.852, 47.368]       | 79.167 [60.870, 94.444]    | 8.333 [0.833, 17.308] *                | 11.806 [-2.381, 25.694]                  | 42.361 [24.667, 57.937] *                  |
| Sensitivity For 15 to 25 mm        | 92.647 [86.420, 95.795]     | 100.000 [100.000, 100.000] | 92.157 [84.946, 96.795]      | 97.059 [90.476, 100.000]   | 82.353 [74.731, 88.889]       | 91.176 [80.000, 100.000]   | 7.353 [3.205, 13.580] *                | 4.902 [2.299, 8.025] *                   | 8.824 [-2.381, 18.860]                     |
| Specificity For 0 to 6 mm          | 82.418 [79.991, 84.765]     | 92.523 [88.789, 95.556]    | 95.144 [94.007, 96.253]      | 98.338 [96.523, 99.612]    | 98.956 [98.404, 99.440]       | 100.000 [100.000, 100.000] | 10.105 [6.041, 13.964] *               | 3.195 [1.021, 4.999] *                   | 1.044 [0.560, 1.596] *                     |
| Specificity For 6 to 8 mm          | 54.916 [47.869, 62.876]     | 71.373 [60.169, 82.487]    | 84.437 [80.530, 88.530]      | 86.150 [82.762, 86.003]    | 95.493 [93.341, 97.522]       | 95.237 [89.863, 99.684]    | 16.457 [7.030, 25.341] *               | 1.714 [-5.946, 8.638]                    | -0.256 [-6.032, 4.212]                     |
| Specificity For 8 to 15 mm         | 37.498 [29.478, 44.934]     | 53.230 [39.815, 66.715]    | 55.661 [46.678, 64.879]      | 75.140 [62.762, 86.003]    | 87.642 [83.164, 91.686]       | 93.460 [85.849, 99.284]    | 15.732 [0.038, 31.094] *               | 19.480 [3.225, 34.562] *                 | 5.818 [-2.599, 12.887]                     |
| Specificity For 15 to 25 mm        | 12.644 [1.442, 29.890]      | 11.635 [0.000, 38.740]     | 26.651 [3.903, 53.065]       | 24.135 [0.000, 55.832]     | 48.846 [26.701, 72.000]       | 35.769 [1.366, 72.603]     | -1.010 [-10.266, 10.342]               | -2.516 [-10.064, 4.762]                  | -13.077 [-36.546, 8.517]                   |
| Sensitivity for non_solid          | 77.778 [62.821, 92.708]     | 93.333 [77.778, 100.000]   | 66.667 [48.148, 85.185]      | 86.667 [66.667, 100.000]   | 41.111 [18.519, 63.889]       | 60.000 [33.333, 83.333]    | 15.556 [-1.667, 33.333]                | 20.000 [0.000, 39.394] *                 | 18.889 [2.083, 38.095] *                   |
| Sensitivity for part_solid         | 98.148 [93.750, 100.000]    | 100.000 [100.000, 100.000] | 83.333 [61.111, 100.000]     | 100.000 [100.000, 100.000] | 57.407 [30.952, 80.556]       | 88.889 [66.667, 100.000]   | 1.852 [0.000, 6.250] *                 | 16.667 [0.000, 38.889] *                 | 31.481 [5.000, 60.471] *                   |
| Sensitivity for poorly_defined     | 83.333 [71.429, 93.750]     | 95.455 [85.000, 100.000]   | 72.727 [56.863, 87.302]      | 86.354 [71.429, 100.000]   | 52.273 [33.333, 70.588]       | 68.182 [46.667, 86.957]    | 12.121 [0.926, 24.638] *               | 13.636 [-2.564, 30.000]                  | 15.909 [2.381, 30.208] *                   |
| Sensitivity for smooth             | 91.111 [86.508, 95.402]     | 96.667 [89.655, 100.000]   | 81.667 [70.667, 91.667]      | 93.333 [82.857, 100.000]   | 56.111 [42.708, 71.212]       | 80.000 [64.000, 93.750]    | 5.556 [-1.282, 11.250]                 | 11.667 [4.444, 20.312] *                 | 23.889 [9.333, 38.739] *                   |
| Sensitivity for solid              | 94.180 [91.667, 96.491]     | 98.413 [94.915, 100.000]   | 91.005 [85.849, 95.278]      | 95.238 [89.394, 100.000]   | 71.164 [62.568, 79.792]       | 88.889 [80.882, 96.296]    | 4.233 [0.926, 7.092] *                 | 4.233 [0.483, 8.209] *                   | 17.725 [8.611, 27.083] *                   |
| Sensitivity for spiculated         | 97.083 [95.000, 98.837]     | 100.000 [100.000, 100.000] | 97.083 [95.000, 98.837]      | 100.000 [100.000, 100.000] | 80.000 [72.500, 86.842]       | 95.000 [87.179, 100.000]   | 2.917 [1.163, 5.000] *                 | 2.917 [1.163, 5.000] *                   | 15.000 [4.023, 25.269] *                   |
| Specificity for non_solid          | 70.422 [58.922, 80.179]     | 58.905 [41.226, 75.075]    | 83.292 [72.161, 91.486]      | 75.715 [59.568, 89.465]    | 96.948 [94.525, 99.010]       | 89.414 [77.718, 99.545]    | -11.517 [-28.456, 4.105]               | -7.576 [-22.676, 6.829]                  | -7.535 [-19.499, 2.833]                    |
| Specificity for part_solid         | 46.899 [23.236, 70.301]     | 63.454 [33.942, 91.718]    | 78.737 [59.839, 93.900]      | 81.394 [55.018, 100.000]   | 92.525 [85.051, 98.620]       | 91.030 [70.655, 100.000]   | 16.555 [0.152, 35.154] *               | 2.656 [-15.163, 16.185]                  | -1.495 [-16.667, 8.272]                    |
| Specificity for poorly_defined     | 63.427 [52.550, 73.748]     | 57.004 [41.872, 71.702]    | 79.005 [69.299, 86.821]      | 75.280 [61.010, 87.457]    | 94.253 [88.838, 98.005]       | 91.380 [82.534, 99.000]    | -6.423 [-19.396, 5.927]                | -3.726 [-15.912, 6.873]                  | -2.873 [-10.968, 3.391]                    |
| Specificity for smooth             | 57.276 [51.648, 62.939]     | 77.535 [70.953, 84.563]    | 80.741 [75.625, 85.678]      | 90.202 [84.805, 94.675]    | 94.618 [91.822, 97.041]       | 93.486 [89.521, 97.128]    | 20.259 [13.614, 27.221] *              | 9.461 [4.289, 14.064] *                  | -1.131 [-4.580, 1.739]                     |
| Specificity for solid              | 57.114 [51.362, 62.345]     | 75.436 [68.256, 82.048]    | 79.396 [74.146, 84.229]      | 87.625 [81.934, 92.493]    | 93.278 [90.155, 95.913]       | 92.984 [88.756, 96.509]    | 18.322 [11.831, 25.134] *              | 8.229 [3.672, 12.669] *                  | -0.294 [-3.321, 2.646]                     |
| Specificity for spiculated         | 43.148 [23.841, 62.712]     | 47.575 [23.480, 71.003]    | 55.145 [34.597, 73.457]      | 49.515 [23.635, 73.073]    | 71.291 [53.891, 86.793]       | 64.009 [41.444, 86.092]    | 4.427 [-7.563, 17.385]                 | -5.630 [-22.090, 10.027]                 | -7.283 [-21.555, 4.917]                    |

**Supplementary Table [5]: Subset analysis on reader study on a single CT volume (without using priors).**

|                                           | Average Reader Lung-RADS 3+ | LUMAS 3+                   | Average Reader Lung-RADS 4A+ | LUMAS 4A+                  | Average Reader Lung-RADS 4B/X | LUMAS 4b/x                 | LUMAS 3+ - Average Reader Lung-RADS 3+ | LUMAS 4A+ - Average Reader Lung-RADS 4A+ | LUMAS 4b/x - Average Reader Lung-RADS 4B/X |
|-------------------------------------------|-----------------------------|----------------------------|------------------------------|----------------------------|-------------------------------|----------------------------|----------------------------------------|------------------------------------------|--------------------------------------------|
| <b>Sensitivity</b>                        | 86.667 [79.710, 92.857]     | 87.500 [76.471, 92.222]    | 82.083 [74.123, 89.394]      | 82.500 [69.048, 93.939]    | 70.000 [59.402, 80.303]       | 72.500 [58.824, 85.714]    | 0.833 [-9.804, 11.765]                 | 0.417 [-10.256, 10.294]                  | 2.500 [-6.818, 12.281]                     |
| <b>Specificity</b>                        | 83.722 [80.745, 86.763]     | 84.208 [79.622, 88.608]    | 89.133 [86.623, 91.590]      | 92.750 [89.599, 95.795]    | 94.427 [92.581, 96.146]       | 96.508 [94.273, 98.525]    | 0.486 [-3.668, 4.593]                  | 3.616 [0.729, 6.582] *                   | 2.081 [-0.009, 4.131]                      |
| <b>PPV</b>                                | 0.462 [0.360, 0.556]        | 0.471 [0.357, 0.593]       | 0.549 [0.437, 0.647]         | 0.647 [0.519, 0.779]       | 0.669 [0.549, 0.766]          | 0.770 [0.632, 0.893]       | 0.010 [-0.060, 0.085]                  | 0.098 [0.012, 0.207] *                   | 0.101 [-0.000, 0.217]                      |
| <b>NPV</b>                                | 0.975 [0.959, 0.988]        | 0.977 [0.955, 0.995]       | 0.969 [0.951, 0.984]         | 0.971 [0.947, 0.992]       | 0.951 [0.929, 0.972]          | 0.956 [0.929, 0.980]       | 0.002 [-0.017, 0.021]                  | 0.002 [-0.014, 0.018]                    | 0.005 [-0.009, 0.020]                      |
| <b>Sensitivity for Stage IA cancers</b>   | 90.351 [79.861, 98.413]     | 89.474 [73.684, 100.000]   | 85.088 [73.810, 95.238]      | 89.474 [73.684, 100.000]   | 73.684 [57.692, 87.681]       | 78.947 [57.895, 95.455]    | -0.877 [-15.909, 12.963]               | 4.386 [-8.333, 16.667]                   | 5.263 [-6.944, 18.421]                     |
| <b>Sensitivity for Stage IB cancers</b>   | 83.333 [0.000, 83.333]      | 100.000 [0.000, 100.000]   | 83.333 [0.000, 83.333]       | 100.000 [0.000, 100.000]   | 83.333 [0.000, 83.333]        | 100.000 [0.000, 100.000]   | 16.667 [0.000, 16.667] *               | 16.667 [0.000, 16.667] *                 | 16.667 [0.000, 16.667] *                   |
| <b>Sensitivity for Stage IIA cancers</b>  | 75.000 [0.000, 83.333]      | 100.000 [0.000, 100.000]   | 75.000 [0.000, 83.333]       | 100.000 [0.000, 100.000]   | 75.000 [0.000, 83.333]        | 100.000 [0.000, 100.000]   | 25.000 [0.000, 33.333] *               | 25.000 [0.000, 33.333] *                 | 25.000 [0.000, 33.333] *                   |
| <b>Sensitivity for Stage IIB cancers</b>  | 0.000 [0.000, 0.000]        | 0.000 [0.000, 0.000]       | 0.000 [0.000, 0.000]         | 0.000 [0.000, 0.000]       | 0.000 [0.000, 0.000]          | 0.000 [0.000, 0.000]       | 0.000 [0.000, 0.000] *                 | 0.000 [0.000, 0.000] *                   | 0.000 [0.000, 0.000] *                     |
| <b>Sensitivity for Stage IIIA cancers</b> | 88.889 [0.000, 100.000]     | 66.667 [0.000, 100.000]    | 88.889 [0.000, 100.000]      | 33.333 [0.000, 100.000]    | 61.111 [0.000, 100.000]       | 33.333 [0.000, 100.000]    | -22.222 [-83.333, 16.667]              | -55.556 [-83.333, 0.000]                 | -27.778 [-50.000, 0.000]                   |
| <b>Sensitivity for Stage IIIB cancers</b> | 79.167 [33.333, 100.000]    | 75.000 [0.000, 100.000]    | 79.167 [33.333, 100.000]     | 75.000 [0.000, 100.000]    | 75.000 [33.333, 100.000]      | 75.000 [0.000, 100.000]    | -4.167 [-33.333, 16.667]               | -4.167 [-33.333, 16.667]                 | 0.000 [-33.333, 33.333]                    |
| <b>Sensitivity for Stage IV cancers</b>   | 90.476 [74.074, 100.000]    | 85.714 [50.000, 100.000]   | 80.952 [58.333, 100.000]     | 85.714 [50.000, 100.000]   | 66.667 [33.333, 92.857]       | 71.429 [33.333, 100.000]   | -4.762 [-40.476, 25.000]               | 4.762 [-18.182, 33.333]                  | 4.762 [-30.952, 41.667]                    |
| <b>Sensitivity For 0 to 6 mm</b>          | 66.667 [0.000, 100.000]     | 50.000 [0.000, 100.000]    | 41.667 [0.000, 50.000]       | 50.000 [0.000, 100.000]    | 16.667 [0.000, 33.333]        | 50.000 [0.000, 100.000]    | -16.667 [-100.000, 66.667]             | 8.333 [-50.000, 66.667]                  | 33.333 [0.000, 66.667] *                   |
| <b>Sensitivity For 6 to 8 mm</b>          | 73.810 [53.704, 91.667]     | 57.143 [20.000, 100.000]   | 64.286 [41.667, 83.333]      | 42.857 [0.000, 85.714]     | 28.571 [8.333, 50.000]        | 14.286 [0.000, 50.000]     | -16.667 [-60.417, 27.778]              | -21.429 [-50.000, 10.000]                | -14.286 [-33.333, 8.333]                   |
| <b>Sensitivity For 8 to 15 mm</b>         | 78.788 [62.500, 93.333]     | 90.909 [69.231, 100.000]   | 72.727 [56.667, 88.889]      | 81.818 [57.143, 100.000]   | 59.091 [44.444, 73.810]       | 72.727 [45.455, 100.000]   | 12.121 [-1.515, 26.190]                | 9.091 [-16.667, 33.333]                  | 13.636 [-8.333, 38.333]                    |
| <b>Sensitivity For 15 to 25 mm</b>        | 97.619 [94.444, 100.000]    | 100.000 [100.000, 100.000] | 97.619 [94.444, 100.000]     | 100.000 [100.000, 100.000] | 96.429 [92.308, 100.000]      | 92.857 [75.000, 100.000]   | 2.381 [0.000, 5.556] *                 | 2.381 [0.000, 5.556] *                   | -3.571 [-19.444, 5.128]                    |
| <b>Specificity For 0 to 6 mm</b>          | 92.217 [90.011, 94.240]     | 94.422 [90.573, 97.635]    | 95.833 [94.482, 97.191]      | 98.760 [96.770, 100.000]   | 99.047 [98.418, 99.611]       | 100.000 [100.000, 100.000] | 2.204 [-2.372, 6.246]                  | 2.927 [0.428, 4.935] *                   | 0.953 [0.389, 1.582] *                     |
| <b>Specificity For 6 to 8 mm</b>          | 73.851 [64.677, 82.719]     | 79.665 [65.970, 91.191]    | 83.559 [75.749, 90.879]      | 84.888 [73.070, 95.128]    | 92.903 [88.841, 96.419]       | 92.305 [82.736, 100.000]   | 5.815 [-5.518, 16.074]                 | 1.329 [-9.842, 11.249]                   | -0.598 [-10.438, 6.843]                    |
| <b>Specificity For 8 to 15 mm</b>         | 66.879 [57.119, 74.616]     | 52.858 [35.291, 69.581]    | 73.947 [64.383, 81.708]      | 80.460 [66.534, 92.056]    | 83.994 [76.417, 89.868]       | 90.572 [80.085, 99.597]    | -14.021 [-30.475, 2.231]               | 6.513 [-4.985, 19.747]                   | 6.578 [-3.228, 16.389]                     |
| <b>Specificity For 15 to 25 mm</b>        | 26.836 [4.214, 52.090]      | 24.671 [0.000, 56.237]     | 42.625 [15.149, 69.902]      | 59.701 [22.734, 93.243]    | 52.795 [29.584, 76.025]       | 71.378 [37.218, 96.563]    | -2.166 [-35.064, 24.352]               | 17.076 [-2.816, 38.530]                  | 18.583 [-5.770, 41.756]                    |
| <b>Sensitivity for non_solid</b>          | 80.000 [58.333, 100.000]    | 80.000 [33.333, 100.000]   | 80.000 [58.333, 100.000]     | 80.000 [33.333, 100.000]   | 63.333 [33.333, 88.889]       | 60.000 [0.000, 100.000]    | 0.000 [-27.778, 25.000]                | 0.000 [27.778, 25.000]                   | -3.333 [-33.333, 25.000]                   |
| <b>Sensitivity for part_solid</b>         | 83.333 [0.000, 100.000]     | 100.000 [0.000, 100.000]   | 66.667 [0.000, 100.000]      | 100.000 [0.000, 100.000]   | 61.111 [0.000, 83.333]        | 66.667 [0.000, 100.000]    | 16.667 [0.000, 33.333] *               | 33.333 [0.000, 50.000] *                 | 5.556 [-50.000, 50.000]                    |
| <b>Sensitivity for poorly_defined</b>     | 85.417 [71.667, 96.667]     | 75.000 [40.000, 100.000]   | 81.250 [68.519, 93.750]      | 75.000 [40.000, 100.000]   | 75.000 [59.091, 91.667]       | 62.500 [28.571, 100.000]   | -10.417 [-41.667, 13.333]              | -6.250 [-38.889, 19.048]                 | -12.500 [-33.333, 10.000]                  |
| <b>Sensitivity for smooth</b>             | 82.456 [72.222, 91.270]     | 94.737 [82.353, 100.000]   | 78.070 [66.667, 88.889]      | 89.474 [73.684, 88.889]    | 63.158 [47.619, 78.070]       | 78.947 [60.000, 95.000]    | 12.281 [-5.208, 27.083]                | 11.404 [-0.725, 23.333]                  | 15.789 [6.667, 26.190] *                   |
| <b>Sensitivity for solid</b>              | 87.500 [80.435, 93.827]     | 93.750 [84.000, 100.000]   | 84.375 [75.758, 92.130]      | 90.625 [79.310, 100.000]   | 75.521 [64.444, 85.714]       | 84.375 [70.968, 96.154]    | 6.250 [-5.128, 17.857]                 | 6.250 [-3.922, 15.686]                   | 8.854 [-1.190, 19.048]                     |
| <b>Sensitivity for spiculated</b>         | 94.444 [84.848, 100.000]    | 100.000 [100.000, 100.000] | 92.222 [79.412, 100.000]     | 100.000 [100.000, 100.000] | 87.778 [72.222, 97.917]       | 93.333 [76.923, 100.000]   | 5.556 [0.000, 15.152] *                | 7.778 [0.000, 20.588] *                  | 5.556 [-12.500, 23.611]                    |
| <b>Specificity for non_solid</b>          | 75.935 [62.791, 86.133]     | 60.470 [36.373, 83.320]    | 85.318 [73.731, 93.623]      | 77.238 [59.235, 94.768]    | 93.007 [86.198, 98.179]       | 82.624 [64.473, 98.351]    | -15.465 [-37.316, 4.730]               | -8.080 [-28.989, 10.168]                 | -10.382 [-26.056, 31.110]                  |
| <b>Specificity for part_solid</b>         | 66.667 [27.778, 99.086]     | 71.882 [33.333, 100.000]   | 71.353 [36.712, 99.086]      | 85.941 [51.371, 100.000]   | 78.647 [51.353, 99.543]       | 85.941 [51.371, 100.000]   | 5.215 [0.000, 16.667] *                | 14.588 [0.000, 36.991] *                 | 7.294 [-5.188, 25.000]                     |
| <b>Specificity for poorly_defined</b>     | 72.803 [59.118, 84.209]     | 64.475 [44.084, 84.114]    | 81.526 [69.109, 91.643]      | 85.967 [71.358, 98.873]    | 90.566 [82.818, 96.832]       | 90.645 [78.882, 99.584]    | -8.328 [-23.235, 5.412]                | 4.441 [-11.860, 19.586]                  | 0.079 [-10.306, 10.097]                    |
| <b>Specificity for smooth</b>             | 80.353 [74.291, 85.468]     | 81.697 [73.414, 89.112]    | 86.835 [81.878, 90.879]      | 91.249 [85.324, 96.076]    | 93.415 [89.871, 96.155]       | 93.320 [87.949, 97.630]    | 1.344 [-5.590, 7.391]                  | 4.414 [-0.152, 9.263]                    | -0.095 [-3.759, 3.316]                     |
| <b>Specificity for solid</b>              | 78.623 [72.631, 84.167]     | 80.013 [72.297, 87.963]    | 85.041 [79.928, 89.675]      | 91.223 [85.445, 96.099]    | 91.628 [87.915, 94.680]       | 94.557 [89.684, 98.539]    | 1.390 [-5.148, 7.412]                  | 6.182 [1.138, 11.135] *                  | 2.928 [-1.298, 7.114]                      |
| <b>Specificity for spiculated</b>         | 54.216 [27.657, 75.748]     | 53.303 [22.246, 83.990]    | 59.209 [34.033, 79.484]      | 53.303 [22.246, 83.990]    | 68.468 [45.075, 87.422]       | 76.652 [48.012, 98.068]    | -0.913 [-26.014, 23.362]               | -5.906 [-31.507, 19.116]                 | 8.183 [-17.408, 32.148]                    |

Supplementary Table [6]: Subset analysis on reader study using prior CT volumes.

|                                                                    | Non-priors | Priors |
|--------------------------------------------------------------------|------------|--------|
| LungRADS 1 vs. 2 vs. 3 vs. 4A vs. 4B bs. 4X raw score disagreement | 0.49       | 0.44   |
| LungRADS 1/2 vs. 3 vs. 4A vs. 4B/X management disagreement         | 0.30       | 0.21   |
| Severe management disagreement (1/2 vs 4a/b/x or 3 vs. 4b/x)       | 0.05       | 0.06   |

**Supplementary Table [7]: Reader disagreements.** Numbers shown are fraction of cases with disagreements. We analyzed three different disagreement types: raw Lung-RADS score disagreement, management level disagreement (which groups Lung-RADS 1 and 2 as done for all other analyses presented) and large management disagreements where the disagreements were not in adjacent risk buckets (i.e. one reader reports Lung-RADS 2 and the other reports Lung-RADS 4A). This includes data from both reader studies (with priors and without priors).

|               |          | Percentage |        |
|---------------|----------|------------|--------|
| Single Volume | Recall@1 | 76/79      | 95.00% |
|               | Recall@2 | 78/79      | 97.50% |
| Priors        | Recall@1 | 34/37      | 91.90% |
|               | Recall@2 | 35/37      | 94.60% |

**Supplementary Table [8]: Recall values on all cancer cases labeled with bounding boxes within the test dataset.** The numerator and denominator refer to the number of found vs total malignant nodules in both single volume cases and those with priors. The @1 and @2 suffixes refer to the top single detection and top two detections surfaced by the detection model, respectively. The corresponding HIT values shown in Figures 2 and 3 focus on the subset of correctly classified cancer cases. Since the HIT@2 metric achieved a 100% hit rate in both baseline and with priors cases, the missed detections may have impacted the classification for these two cancer cases.



|                                                                                | LUMAS downgrades<br>relative to reader |        | LUMAS upgrades<br>relative to reader |        |
|--------------------------------------------------------------------------------|----------------------------------------|--------|--------------------------------------|--------|
|                                                                                | No Cancer                              | Cancer | No Cancer                            | Cancer |
| Cluster of vessels<br>simulating nodule?                                       | 16                                     | 0      | 8                                    | 0      |
| Endobronchial nodule?                                                          | 4                                      | 0      | 0                                    | 0      |
| Lesion could be<br>categorized as<br>scarring?                                 | 126                                    | 4      | 94                                   | 0      |
| Lesion crosses normal<br>anatomic boundaries?                                  | 0                                      | 5      | 0                                    | 1      |
| Motion artifact in the<br>lungs?                                               | 0                                      | 2      | 10                                   | 16     |
| Possible cystic<br>neoplasm?                                                   | 4                                      | 0      | 0                                    | 0      |
| Scarring appears<br>nodular in axial, more<br>obviously scarring in<br>planes? | 106                                    | 4      | 50                                   | 0      |
| Stable compared to<br>prior?                                                   | 142                                    | 0      | 96                                   | 0      |

**Supplementary Table [9]: Summary of the differences between the model and the consensus of the readers.** Each disagreement with a reader in cases where the model disagreed with the consensus of the readers appears once for every time one of the questions in the leftmost column is true.

### *Kernel Selection*

Each case often had multiple reconstruction kernels available. When running the model on a case we selected harder kernels commonly used in lung imaging (see list below). In the reader study, we used the same volumes that were chosen for the model. Within each case we chose the highest ranked kernel according to the following lists. There were no cases with more than one manufacturer.

- Siemens
  - 1. *B50f*, 2. *B45f*, 3. *B50s*, 4. *B40f*, 5. *B41s*, 6. *B60f*, 7. *B60s*, 8. *B70f*, 9. *B36f*, 10. *B35f*, 11. *B30f* 12. *B31s*
- GE
  - 1. *LUNG*, 2. *BONE*, 3. *BODY FILTER/BONE*, 4. *STANDARD*, 5. *BODY FILTER/STANDARD*, 6. *SOFT*, 7. *EXPERIMENTAL7*, 8. *BODY FILTER/EXPERIMENTAL7*

- Philips
  - 1. *D*, 2. *C*, 3. *B*, 4. *A*
- Toshiba
  - 1. *FC51*, 2. *FC50*, 3. *FC52*, 4. *FC53*, 5. *FC30*, 6. *FC11*, 7. *FC10*, 8. *FC82*, 9. *FL04*, 10. *FC02*, 11. *FC01*, 12. *FL01*

### *Additional Modeling Details*

At a high level, our model begins with lung segmentation, followed by detection, and ending with classification, an approach that has been described in past research. However, for each of these components, we upgraded the specific techniques to state of art approaches (at the time of publication) for the general computer vision tasks: MaskRCNN<sup>44</sup> for instance segmentation, Retinanet<sup>47</sup> for object detection, and I3D<sup>47,49</sup> for action recognition from video (also a volume classification task).

Different lung segmentation approaches vary in terms of quality and computational cost. In our case, the approach used was solely to determine a center point of the lung segmentation bounding box and therefore precise lung boundaries were not a critical factor in the final results. One advantage of the MaskRCNN approach is that the segmentation is performed on two-dimensional (2D) slices and is independent of slice spacing.

The cancer ROI detection model was trained on LIDC first, and then we collected additional labels on NLST to fine tune the model to only detect malignant nodules instead of all nodules.

For classification, we found on our tune set that I3D alone performed well when predicting cancer directly. We then sought to combine this full volume approach with our two-stage approach (see Methods - *Model Development and Training*). We used I3D as the base feature extractor for classification tasks after determining it outperformed several other feature extractors on our tune set. We used the spatial resolutions shown in Extended Data Figure 10, which were the highest resolutions allowed by commercial hardware. For the cancer ROI detection and cancer risk prediction model, we were able to train on subvolumes smaller than the

whole volume, which allowed us to use 1.4 mm x 0.7 mm<sup>2</sup> resolution images. While this may introduce additional “partial voluming” effects seen in clinical radiology, what the algorithm “sees” is generally quite different compared to human perception, and the training and evaluation was performed solely on these resampled volumes. For the full volume model we used a resampled 1.5 mm<sup>3</sup> resolution. Detecting cancer alone for the full volume model is difficult due to the wide range of appearance and locations of nodules; therefore, the model was also trained to detect the presence of nodules. In order to assess the contribution of the full volume model, we retrospectively computed an AUC of 89.0% on the test set. Additionally, the subjective analysis showed evidence that the model focused on nodules (see Supplementary - “*Subjective Analysis and Review of Results*”). These results demonstrate that the full volume model effectively collected features relevant for cancer detection.

### *Subjective Analysis*

We analyzed subsets in which LUMAS differed from the majority vote of our six readers. We first examined disagreements between our model and Retrospective-Lung-RADS on the tune set with three radiologists to generate hypotheses to pursue on the test cases. They generated nine hypotheses framed as questions with categorical answers. We then labeled all cases in the without prior reader study where the LUMAS bucket disagreed with the consensus reader bucket. Upon labeling disagreements, the most commonly present hypotheses were “Lesion could be categorized as scarring?,” “Stable compared to prior?” (only for cases with priors), “Scarring appears nodular in axial, more obviously scarring in orthogonal planes?” The full results of this analysis are shown in Supplementary Table 9, where each disagreement with a reader shows up once in the table for every time one of the hypotheses was labeled as true.

Additionally, to better characterize and analyze model behavior, attribution regions for 12 cases in the tune set were examined through focused questions. These regions were computed using integrated gradients to show positive and negative classification influences<sup>53</sup>. A series of questions concerning the model’s region of focus for the global and local views were given. All readers unanimously agreed that both positive and negative attributions focused on the nodules

in all cancer positive cases. In 40% of the negative cases, the readers noted that parenchymal vasculature was highlighted. In 86% of the cancer positive cases, the readers noted that the full volume model focused on the same nodule as the two-stage model. Finally, in characterizing the region on the nodule examined, the strongest agreement was that for 4 of 7 of the cancer positive cases the readers agreed that the negative attributions were examining the edges of the nodule. Extended Data Figures 6a and 6b give examples of these cases.

### *Review of Results*

The final manuscript draft was evaluated using the Radiomics Quality Score system (Radiomics, Maastricht, Netherlands) prior to submission receiving a score of 92%.

### *Subset Analysis*

We computed the sensitivity and specificity of the model's risk buckets and the average readers risk buckets on subsets based on nodule properties, lung cancer staging, and nodule size. This information was collected in the NLST trial. For some subsets, such as cancer staging, there were only cancer positive examples in the subset and therefore we only computed sensitivity. Full results are shown in Supplementary Tables 5 and 6.
